# Supplementary material for: Trends in Population-Based Studies of Human Genetics in Infectious Diseases
Source: PLoS One. 2012 Feb 7;7(2):e25431. doi: 10.1371/journal.pone.0025431 (PMC3274513; doi:10.1371/journal.pone.0025431)
Supplement: Table S1 — List of genes by category. Gene categories based on Kaslow, et al., 2008. (XLSX) [file pone.0025431.s001.xlsx]

## Sheet: TableS1
Table S1. List of genes comprising each gene category
Cytokine and related genes	HLA Class II & related genes	Chemokine receptor & ligand genes	TNF & related genes	HLA Class I & related genes	Toll-like receptor genes	Complement (includes MBL genes)	Ig Fc & related receptor genes	Killer Ig-like receptor genes	Metal transport genes	Red blood cell genes
n=60	n=11	n=46	n=7	n=5	n=11	n=6	n=6	n=15	n=3	n=7
IL10	HLA-DMA	CCR5	TNF	HLA-A	TLR1	C3	FCGR1A	KIR2DL1	SLC11A1	GYPB
IL1B	HLA-DMB	CCR2	LTA	HLA-B	TLR10	C5	FCGR2A	KIR2DL2	SLC11A2	HBA1
IL6	HLA-DPA1	CXCL12	LTB	HLA-C	TLR2	MASP1	FCGR2B	KIR2DL3	SLC40A1	HBB
IL1RN	HLA-DPB1	CCL5	TNFRSF1A	HLA-E	TLR3	MASP2	FCGR3A	KIR2DL4		DARC
IFNG	HLA-DQA1	IL8	TNFRSF1B	HLA-G	TLR4	MBL1P1	FCGR3B	KIR2DL5A		SLC4A1
IL4	HLA-DQB1	CCL2	LST1		TLR5	MBL2	FCRL3	KIR2DP1		G6PD
TGFB1	HLA-DRA	CX3CR1	FAS		TLR6			KIR2DS1		HP
IL1A	HLA-DRB1	CCL3L1			TLR7			KIR2DS2
IL12B	HLA-DRB3	CCR3			TLR8			KIR2DS3
IL4R	HLA-DRB4	CXCR4			TLR9			KIR2DS4
IFNGR1	HLA-DRB5	CCL3			CD14			KIR2DS5
IL2		CCL11						KIR3DL1
IL1R1		CCL8						KIR3DL2
IL13		CXCL2						KIR3DL3
IL18		CCL1						KIR3DS1
IL12A		CCL16
IFNAR1		CCL4
IL10RA		CCL4L1
IL12RB1		CCL7
MX1		CXCL10
IRF1		CXCL14
IL8RA		CXCR6
IL8RB		CCR1
IL2RB		CCR6
IL12RB2		CCL13
IFNGR2		CCL14
IL5		CCL15
IL10RB		CCL17
IL6R		CCL18
IL2RA		CCL19
IL1RAP		CCL22
IL1R2		CCL23
IL17F		CCL24
IL18R1		CCL25
IL19		CCL26
IL20		CCL27
IL9		CCL28
IL1RL1		CX3CL1
IL23R		CXCL1
IL15		CXCL13
IL16		CXCL16
IL17A		CXCL3
IL22		CXCL5
IL24		CXCL6
IL2RG		CXCL9
IL3		CXCR3
IL5RA
IL7R
IL11
IL13RA1
IL13RA2
IL15RA
IL17RA
IL21
IL26
IL27
IL27RA
IL3RA
IL7
IL9R
