# Supplementary material for: Trends in Population-Based Studies of Human Genetics in Infectious Diseases
Source: PLoS One. 2012 Feb 7;7(2):e25431. doi: 10.1371/journal.pone.0025431 (PMC3274513; doi:10.1371/journal.pone.0025431)
Supplement: Table S2 — Gene-disease associations by gene category, 2001–2010. Gene categories based on Kaslow et al., 2008. (XLSX) [file pone.0025431.s002.xlsx]

## Sheet: TableS2
Table S2. Gene-disease associations by gene category*, 2001-2010
Gene category	HBV	HCV	HIV	H. pylori	Malaria	Sepsis	TB	Other	Total	Total (%)
Cytokine receptor genes	162	156	110	291	55	119	115	772	1780	0.181281
Chemokine receptor and ligand genes	44	50	397	34	3	16	15	150	709	0.0722069
HLA Class II genes	68	75	72	43	19	8	46	292	623	0.0634484
TNF and related genes	39	47	29	63	30	62	26	212	508	0.0517364
Toll-like receptor genes	19	16	27	39	23	67	36	222	449	0.0457277
HLA Class I genes	24	53	159	11	11	12	15	162	447	0.045524
Killer immunoglobulin-like receptor genes	23	48	27	0	3	2	0	160	263	0.0267848
Complement genes	13	13	23	3	5	31	14	117	219	0.0223037
Immunoglobulin Fc and related receptor genes	3	2	12	0	16	13	2	70	118	0.0120175
Red blood cell genes	0	2	7	0	53	7	1	7	77	0.00784194
Metal transport genes	1	1	3	0	0	0	41	25	71	0.00723088
Genes not categorized	910	463	846	319	141	168	194	1514	4555	0.463897
Total	1306	926	1712	803	359	505	505	3703	9819	1
*Categories based on Kaslow et al., 2008.
