# Supplementary material for: Trends in Population-Based Studies of Human Genetics in Infectious Diseases
Source: PLoS One. 2012 Feb 7;7(2):e25431. doi: 10.1371/journal.pone.0025431 (PMC3274513; doi:10.1371/journal.pone.0025431)
Supplement: Table S4 — Meta-analyses of case-control studies related to infectious diseases, 2001–2010. (XLSX) [file pone.0025431.s004.xlsx]

## Sheet: TableS4
Table S4 - Meta-analyses of case-control studies related to infectious diseases, 2001–2010.
Reference	Phenotype	Gene	#Studies	Contrast	#Cases	#Controls	Effect size*	Hetero- geneity§
Ioannidis JP,2001	HIV-1 progression to AIDS	CCR5	2	CCR5Δ32 allele vs. non	NR	NR	0.12 (0.02-0.62)	NR
		CCR2	2	CCR2-64I allele vs. non			0.42 (0.22-0.81)
Hong X, 2005	self-limiting HCV	HLA-DRB1	10	DRB1*1101 allele vs. non	706	1524	2.02 (1.56-2.62)	p<0.05
		HLA-DQB1	10	DQB1*0301 allele vs. non	714	1497	2.36 (1.62-3.43)	p=0.0005
Lewis SJ, 2005	pulmonary TB acquisition	VDR	8	TaqI tt vs. TT Tt vs. TT	1614	1883	1.00 (0.59-1.70) 0.95 (0.80-1.14)	p=0.02
			6	FokI ff vs. FF Ff vs. FF	841	1419	1.12 (0.67-1.86) 0.99 (0.81-1.22)	NS
Li HT, 2006	TB acquisition (inclusion criteria not discussed)	SLC11A1	10	3'UTR variant: TGTG+ vs. TGTG del	1576	2364	1.33 (1.08-1.63)	p=0.044
			9	D543N variant: G vs. A	1398	1585	1.67 (1.36-2.05)	NS
			6	INT4 variant: G vs. C	982	1312	1.14 (0.96-1.35)	p=0.08
			7	5'(GT)n allele 3 vs. others	1603	2259	1.32 (1.03-1.68)	p=0.001
Pacheco AG, 2008	pulmonary TB acquisition (inclusion criteria not discussed)	IFNG	11	IFNG +874 TT genotype, T allele, T carrier†	3124	2869	0.59 (0.45-0.78)	p=0.0571
		IL10	8	IL10 -1082 GG genotype, G allele, G carrier†	1631	2328	0.69 (0.42-1.13)	p=0.0007
		TNF	10	TNF -308 AA genotype, A allele, A carrier†	1167	1720	0.74 (0.42-1.32)	NS
Brouwer MC, 2009	pneumococcal disease	MBL2	3	homozygosity for variant alleles‡	432	765	2.58 (1.38-4.80)	NR
	pneumococcal disease	TLR2	2	Arg753Gln polymorphism vs. non	184	587	0.84 (0.29-2.39)	NR
	pneumococcal disease meningococcal disease	TLR4	2 4	Asp299Gly polymorphism vs. non	184 1693	587 1471	0.83 (0.20-3.37) 1.10 (0.84-1.46)	NR
	meningococcal disease	IL1B	2 2	IL1B -511C/T vs. non IL1B +3954C/T vs. non	1328 468	1278 870	0.95 (0.70-1.29) 0.76 (0.38-1.50)	NR
	pneumococcal disease meningococcal disease	FcγRIIa	3 5	FcγRIIa Arg131His vs. non	182 353	645 829	1.53 (0.75-3.12) 1.35 (0.86-2.14)	NR
Pereira AC, 2008	leprosy	IL10	5	IL10 -819 TT genotype, T allele, T carrier†	229	144	1.66 (1.29-2.15)	NS
Auburn S, 2008	severe malaria	GNAS	4	rs2057291 A allele vs. non rs2057291 AA genotype vs. non	3799	4355	0.9 (0.82-0.98) 0.75 (0.58-0.96)	NS
			4	rs6026592 G allele vs. non rs6026592 AA genotype vs. non	3799	4355	1.13 (1.05-1.21) 1.2 (1.03-1.39)	NS
			4	rs6128461 C allele vs. non rs6128461 CC genotype vs. non	3799	4355	1.09 (1.01-1.17) 1.23 (1.05-1.43)	NS
			4	rs3730171 (185 I/I) C allele vs. non rs3730171 (185 I/I) CC genotype vs. non	3799	4355	1.13 (1.04-1.22) 1.14 (0.91-1.43)	NS
Teuffel O, 2009	sepsis susceptibility sepsis mortality	TNFα	17 12	TNFα -308 A allele vs. GG genotype	670 371	1187 844	2.15 (1.45-3.19) 1.48 (0.81-2.70)	p<0.01 p<0.01
Zheng M, 2009	chronic HBV infection	TNFα	21	TNFα -308 GA genotype vs. GG genotype AA genotype vs. GG genotype A allele vs. GG genotype	4230	2905	0.73 (0.57-0.93) 0.28 (0.19-0.43) 0.70 (0.55-0.89)	p=0.0001 p=0.0001 p=0.0001
Gao L, 2010	tuberculosis susceptibility	VDR	19	TaqI tt vs. TT Asian African South American	802 989 103	1153 1281 205	2.0 (1.3-3.2) 1.0 (0.7-1.3) 0.8 (0.4-2.0)	NS NS NS
			20	FokI ff vs. FF Asian African South American	603 1470 116	725 1589 234	1.4 (0.9-2.1) 1.1 (0.6-2.1) 1.8 (0.5-6.4)	NS p<0.1 NS
			12	ApaI aa vs. AA Asian African	205 948	228 1304	1.3 (0.4-4.5) 1.8 (1.2-2.8)	NS p<0.1
			10	BsmI bb vs. BB Asian African	214 533	274 726	0.5 (0.4-0.8) 1.2 (0.8-1.6)	NS NS
Persson C, 2010	gastric cancer susceptibility	IL1B	37	IL1B-511 rs16944 homozygoes vs. wild-type carriers vs. wild-type	9905	14672	1.07 [NR] 1.05 [NR]
		IL1B	31	IL1B-31 rs1134627 homozygoes vs. wild-type carriers vs. wild-type			0.92 [NR] 0.94 [NR]
		IL1B	12	IL1B+3954 rs143634 homozygoes vs. wild-type carriers vs. wild-type			0.96 [NR] 1.26 [NR]
		IL1RN	32	IL1RN VNTR homozygoes vs. wild-type carriers vs. wild-type			1.39 [NR] 1.17 [NR]
		IL8	12	IL8-251 rs4073 homozygoes vs. wild-type carriers vs. wild-type			0.96 [NR] 1.04 [NR]
		IL10	7	IL10-1082 rs1800896 homozygoes vs. wild-type carriers vs. wild-type			1.40 [NR] 1.11 [NR]
		IL10	5	IL10-819 rs3021097 homozygoes vs. wild-type carriers vs. wild-type			0.91 [NR] 0.86 [NR]
		IL10	8	IL10-592 rs1800872 homozygoes vs. wild-type carriers vs. wild-type			0.93 [NR] 0.94 [NR]
		TNFα	17	TNFα-308 rs1800629 homozygoes vs. wild-type carriers vs. wild-type			1.23 [NR] 1.09 [NR]
		TNFα	7	TNFα-328 rs361525 homozygoes vs. wild-type carriers vs. wild-type			1.46 [NR] 1.11 [NR]
Qin H, 2010	hepatocellular carcinoma (HCC)	TNFα	10	TNFα -308GG polymorphism HCC cases vs. healthy controls HCC cases vs. HBV-infected cases	1421	1068 HBV 1254 healthy	0.56 [0.43-0.73] 1.09 [0.81-1.45]	NS
Zaffanello M, 2010	renal scar formation following urinary tract infection	ACE	4	ACE D/D + D/I vs. I/I	299	40	1.84 (0.89-3.84)	NS
			4	ACE D/D vs. D/I + I/I	119	220	1.73 (1.09-2.74)	p=0.006
		TGFβ1	3	TGFβ1-509 T/T + C/T vs. C/C	172	94	2.24 (1.34-3.76)	p=0.001
			3	TGFβ1-509 T/T vs. C/T + C/C	55	211	1.28 (0.70-2.35)	p=0.006
Zhang L, 2010	chronic HCV infection	IL10	8	IL10 -1028G/A GG vs.AA + AG AG vs. GG + AA AA vs. AG + GG AA vs. AG AG vs. GG AA vs. GG	992	1123	1.570 (1.160-2.123) 0.805 (0.648-0.999) 0.998 (0.786-1.218) 1.121 (0.887-1.416) 0.608 (0.439-0.840) 0.680 (0.489-0.947)	NS
			6	IL10 -819C/T TT vs. TC + CC TC vs. TT + CC CC vs. TT + TC TT vs. TC TC vs. CC TT vs. CC			1.027 (0.751-1.402) 0.903 (0.704-1.161) 1.130 (0.837-1.527) 1.067 (0.770-1.479) 0.860 (0.626-1.179) 1.011 (0.628-1.630)
			7	IL10 -592C/A AA vs. AC + CC AC vs. AA + CC CC vs. AA + AC AA vs. AC AC vs. CC AA vs. CC			0.975 (0.733-1.295) 0.990 (0.781-1.255) 1.403 (0.778-1.399) 0.986 (0.732-1.330) 0.951 (0.699-1.296) 0.996 (0.639-1.550)
*Odds Ratio unless otherwise noted
†Only results from genoytpe contrasts (T/T, G/G, A/A) shown here
‡Variant alleles are Gly54Asp ("B"), Gly57Glu ("C"), and Arg52Cys ("D"); "A" denotes wild type, and homozygotes include genotypes D/D, B/B, C/C, D/B, B/C, D/C
§ Heterogeneity not significant (NS), not reported (NR), or significant (value reported)
