# Supplementary material for: Trends in Population-Based Studies of Human Genetics in Infectious Diseases
Source: PLoS One. 2012 Feb 7;7(2):e25431. doi: 10.1371/journal.pone.0025431 (PMC3274513; doi:10.1371/journal.pone.0025431)
Supplement: Table S5 — Meta-analyses of cohort studies related to infectious diseases, 2001–2010. (XLSX) [file pone.0025431.s005.xlsx]

## Sheet: TableS5
Table S5 - Meta-analyses of cohort studies related to infectious diseases, 2001–2010.
Reference	Phenotype	Gene	# Studies	Contrast	#Person-Yrs	#Events	Effect size*	Hetero- geneity§
Ioannidis JP, 2001	HIV-1 progression to AIDS	CXCL12	13	SDF-1 3' A homozygotes vs. others	845.4 14497.9	†	0.99 (0.44-2.23) 1.03 (0.80-1.34)	p=0.02 NS
		CCR5	13 14°	CCR5Δ32 allele vs. non	11757 17614	581 1375	0.74 (0.56-0.97) 0.70 (0.54-0.91)	NS p=0.11
		CCR2	13 14°	CCR2-64I allele vs. non	11757 17614	581 1375	0.76 (0.60-0.96) 0.88 (0.76-1.01)	NS NS
Ioannidis JP, 2003	HIV-1 progression to AIDS (perinatal)	CCR5	10	CCR5Δ32 allele vs. non	6117	456	0.84 (0.58-1.23)	NS
		CCR2	10	CCR2-64I allele(s) vs. non	4114	456	0.87 (0.67-1.14)	NS
Contopoulos-Ioannidis DG, 2003	HIV-1 susceptibility (perinatal)	CCR5	11	CCR5Δ32 heterozygotes vs. wild-type	n=3866	1540	1.04 (0.92-1.17)	NS
Chauhan M, 2008	sepsis	IL6	6	IL-6 –174C allele vs. non	n=1326	376	0.90 (0.62-1.31)	p<0.05
Brouwer MC, 2010	meningococcal disease mortality	MBL2	2	MBL2 ≥1 of 52Cys, 54Asp, or 57Glu vs. none	282	35	1.44 (0.64-3.19)	NS
		IL1RN	2	IL1RN +2018 C/T + T/T vs. C/C	1391	112	1.85 (1.25-2.76)	NS
		IL1RN	2	IL1RN VNTR 2/2 vs. 1/1 + 1/2	327	NA	1.59 (0.60-4.07)	NS
		IL1B	2	IL1B -511 T/T vs. C/C + C/T	1354	106	1.81 (1.09-2.97)	NS
		IL1B	2	IL1B 3954 C/T + T/T vs/ C/C	468	46	1.14 (0.61-2.12)	NS
		TNF	4	TNF -308 A/G + A/A vs. G/G	1381	135	1.01 (0.67-1.52)	NS
		SERPINE1	4	SERPINE1 4G/5G vs. none	960	117	2.23 (1.48-3.35)	NS
Chalmers JD, 2010	cystic fibrosis: P. aeruginosa colonization	MBL	4	MBL insufficient (O/O genotype) vs. sufficient	NR	NR	1.42 (0.43-4.72)	NR
	cystic fibrosis: age of acquisition of P. aeruginosa	MBL	4	MBL insufficient vs. sufficient	n=1648		mean difference 2.83 (1.63-4.03)	p=0.01
	cystic fibrosis: B. cepacia colonization	MBL	7	MBL insufficient (O/O genotype) vs. sufficient MBL O/O + O/A genotype vs. sufficient	n=870	64	3.46 (1.14-10.52) 1.26 (0.79-2.0)	NS
*Risk Ratio unless otherwise noted
°The authors looked at two subgroups: seroconverters (shown on top) and seroprevalent patients (shown below); Hazard Ratio shown, for time until AIDS diagnosis
†Number of events not given for SDF-1 effect on HIV-1 progression to AIDS
§ Heterogeneity not significant (NS), not reported (NR), or significant (value reported)
