# Supplementary material for: Trends in Population-Based Studies of Human Genetics in Infectious Diseases
Source: PLoS One. 2012 Feb 7;7(2):e25431. doi: 10.1371/journal.pone.0025431 (PMC3274513; doi:10.1371/journal.pone.0025431)
Supplement: Table S6 — Meta-analyses of pharmacogenomics studies related to infectious diseases, 2001–2010. (XLSX) [file pone.0025431.s006.xlsx]

## Sheet: TableS6
Table S6 - Meta-analyses of pharmacogenomics studies related to infectious diseases, 2001–2010.
Reference	Phenotype	Gene	# Studies	Contrast	# Persons	# Events	Effect size*	Hetero- geneity§
Alfirevic A, 2003	SMX hypersensitivity	NAT2	4	NR	NR	NR	2.25 (0.45-11.2)	NR
Sun F, 2008	anti-TB drug-induced hepatotoxicity	CYP2E1	5	CYP2E1*1A/*1A vs. others	701	176	2.22 (1.06-4.66)	0.06
		GSTM1	5	GSTM1 null/null vs. null/+ & +/+	192	96	2.62 (1.45-4.75)	NS
		GSTT1	5	GSTT1 null/null vs. null/+ & +/+	192	96	1.18 (0.61-2.29)	NS
		NAT2	5	NAT2 mt/mt vs. w/mt and w/w	625 526	133 99	all: 1.93 (0.81-4.62) Asian: 2.52 (1.49-4.26)	0.03 NS
Padol S, 2006	proton pump inhibitor-related H. pylori eradication	CYP2C19	17	HomEM vs. PM† all therapies combined omeprazole lansoprazole rabeprazole HomEM vs. HetEM all therapies combined omeprazole lansoprazole rabeprazole HetEM vs. PM all therapies combined omeprazole lansoprazole rabeprazole	HomEM vs. PM 1168 430 169 324 HomEM vs. HetEM 1,807 N/A N/A N/A HetEM vs. PM 1321 N/A N/A N/A	HomEM vs. PM 889 303 132 203 HomEM vs. HetEM 1,396 N/A N/A N/A HetEM vs. PM 1113 N/A N/A N/A	HomEM vs. PM 2.70 (1.46-4.98) 4.03 (1.97-8.28) 1.80 (0.67-4.85) 1.04 (0.44-2.46) HomEM vs. HetEM 1.90 (1.38-2.60) 2.12 (1.38-3.25) 1.59 (0.87-2.88) 1.71 (0.93-3.13) HetEM vs. PM 1.36 (0.89-2.07) 2.24 (1.09-4.61) 0.73 (0.28-1.88) 0.66 (0.36-1.23)	>0.05
Zhao F, 2008	proton pump inhibitor-related H. pylori eradication	CYP2C19	20	HomEM vs. PM† all therapies combined omeprazole lansoprazole rabeprazole HomEM vs. HetEM all therapies combined omeprazole lansoprazole rabeprazole HetEM vs. PM all therapies combined omeprazole lansoprazole rabeprazole	HomEM vs. PM‡ 1735 HomEM vs. HetEM 2815 HetEM vs. PM 2034	HomEM vs. PM‡ 1383 HomEM vs. HetEM 2248 HetEM vs. PM 1771	HomEM vs. PM 2.79 (1.77-4.41) 4.28 (1.88-9.74) 3.06 (1.56-6.00) 1.35 (0.42-4.32) HomEM vs. HetEM 2.00 (1.47-2.71) 3.22 (1.91-5.42) 1.95 (1.03-3.70) 1.04 (0.54-2.00) HetEM vs. PM 1.73 (1.23-2.44) 1.43 (0.60-3.63) 1.62 (0.82-3.20) 1.57 (0.84-2.94)	NR
Veloso S, 2010	Antiretroviral therapy-related lipodystrophy syndrome in HIV-1-infected patients	TNFα	3	TNFα -238 GG vs. GA + AA TNFα -238 A allele vs. non TNFα -308 GG vs. GA + AA TNFα -308 A allele vs. non	258 258 265 265	305 305 301 301	1.41 (0.82-2.42) 1.40 (0.84-2.35) 0.82 (0.42-1.62) 0.83 (0.58-1.19)	NS
*Risk Ratio unless otherwise noted
°The authors looked at two subgroups: seroconverters (shown on top) and seroprevalent patients (shown below); Hazard Ratio shown, for time until AIDS diagnosis
§ Heterogeneity not significant (NS), not reported (NR), or significant (value reported)
†Strata represent dual or triple therapies comprising one PPI (omeprazole, lansoprazole, or rabeprazole) combined with one or two antibiotics; HomEM = *1/*1, HetEM = *1/*2 or *1/*3, PM = *2/*2, *1/*2 and *1/*3, or *3/*3; *3 refers to mutation on exon4, *2 refers to mutation on exon5
‡Sample sizes reported for all triple therapies combined
§§Heterogeneity not reported for individual therapy subset analyses, expect rabeprazole: HomEM vs. PM (p=0.61), HomEM vs. HetEM (p=0.91), HetEM vs. PM (p=0.19)
