# Supplementary material for: Trends in Population-Based Studies of Human Genetics in Infectious Diseases
Source: PLoS One. 2012 Feb 7;7(2):e25431. doi: 10.1371/journal.pone.0025431 (PMC3274513; doi:10.1371/journal.pone.0025431)
Supplement: Table S7 — Genome-wide association studies related to infectious diseases, 2005–2010. (XLSX) [file pone.0025431.s007.xlsx]

## Sheet: TableS7
Table S7 - Genome-wide association studies related to infectious diseases, 2005–2010
Reference	Disease	Initial Sample Size	Replication Sample Size	Region	Reported Gene	Strongest SNP Risk Allele	Risk Allele Freq in Controls	p-value	OR (95% CI)
Fellay J, 2007	HIV-1 viral set-point	486	140	NS*	NS	NS	NS	NS	NS
Burgner, 2009	Kawasaki disease°	107 cases 134 controls	583 cases 1357 family members	3q26.31 16q22.3	NAALADL2 ZFHX3	rs17531088-T rs7199343-T	0.44 0.30	1x10-6 2x10-6	1.43 (1.32-1.53) 1.56 (1.33-1.92)
Fellay J, 2009	HIV-1 control	2362	NR	6p21.33 6p21.33	HCP5,HLA-B HLA-C	rs2395029-G rs9264942-C	0.048 0.412	5x10-35 6x10-32	5.8% [NR] increase 5.3% [NR] increase
Ge D, 2009	HCV, viral clearance	1137	NR	19q13.2 6q21 4q34.3	IL28B AKD2 Intergenic	rs12979860-C rs9400317-? rs17067123-?	0.72 NR NR	1x10-28 1x10-6 8x10-6	2 (1.8-2.3) NR NR
Jallow M, 2009	malaria	958 cases 1382 controls	1087 cases 2376 controls	11p15.4 17p13.1 7p12.2	HBB SCO1 DDC	rs11036238-? rs6503319-T rs1451375-?	0.14 0.45 0.78	4x10-11 7x10-7 6x10-6	1.59 (1.39-1.82) 1.21 (1.12-1.31) 1.33 (1.18-1.52)
Kamatani Y, 2009	chronic hepatitis B	179 cases 934 controls	1907 cases 3367 controls	6p21.32	HLA-DPB1	rs9277535-G	0.56	6x10-39	1.75 (1.61-1.92)
Le Clerc S, 2009	AIDS progression	85 French cases 2049 French controls	NR	1p13.3 12p12.1 9p23 1q23.3 8q22.3 2q12.1 9p22.3	Intergenic SOX5 Intergenic RXRG Intergenic TGFBRAP1 NR	rs4118325-G rs1522232-C rs1360517-A rs10800098-A rs3108919-C rs1020064-G rs1556032-C	0.81 0.52 0.06 0.05 0.27 0.23 0.49	6x10-7 2x10-6 3x10-6 4x10-6 4x10-6 7x10-6 9x10-6	4.17 (2.17-8.33) 2.22 (1.59-3.13) 3.09 (2.00-4.78) 3.29 (2.08-5.20) 2.13 (1.56-2.91) 2.94 (1.75-5.00 2.05 (1.48-2.84
Limou S, 2009	AIDS progression	275 cases 1438 controls	626 cases	6p21.33 6p21.33 6p21.33	HCP5,MICB,MCCD1, BAT1,LTB,TNF HLA-C ZNRD1,RNF39	rs2395029-G rs10484554-T rs8321-G	0.03 0.13 NR	3x10-19 6x10-8 5x10-7	3.47 (2.39-5.04) NR NR
Shrestha S, 2009	carotid atherosclerosis in HIV-infected men	177 cases	NR	15q14 7q31.33 7p15.2 22q12.2 5q12.3 10q23.1 5q34	RYR3 GRM8 Intergenic RFPL1,AP1B1,THOCS, NF2 MAST4 Intergenic Intergenic	rs2229116-G rs17691394-G rs17151904-A rs13053817 rs1697137-C rs588517-A rs958994-G	0.18 0.20 0.20 0.18 0.36 0.15 0.27	3x10-8 9x10-7 1x10-6 2x10-6 2x10-6 8x10-6 8x10-6	NR NR NR NR NR NR NR
Suppiah V, 2009	response to HCV treatment	131 responders 162 non-responders	261 responders 294 non-responders	19q13.2	IL28A IL28B	rs8099917-G	NR	9x10-9	1.98 (1.57-2.52)
Tanaka Y, 2009	response to HCV treatment	72 responders 82 non-responders	122 responders 50 non-responders	19q13.2	IL28B	rs8099917-G	0.12	3x10-32	27.1 (14.6-50.3)
Tse K, 2009	nasopharyngeal carcinoma	277 cases 285 controls	636 cases 1640 controls	6p21.33 6p22.1 6p22.1	HLA-A GABBR1 HLA-F	rs2517713-A rs29232-A rs3129055-G	0.62 0.46 0.31	4x10-20 9x10-17 7x10-11	1.88 (1.65-2.15) 1.67 (1.48-1.88) 1.51 (1.34-1.71)
Zhang FR, 2009	leprosy susceptibility	706 cases 1225 controls	3254 cases 5955 controls	13q14.11 16q12.1 6p21.32 9q32 8q21.3 8q21.2	C13orf31 NOD2 HLA-DRDQ TNFSF15 RIPK2 RIPK2	rs3764147-G rs9302752-G rs602875-A rs6478108-A rs42490-G rs40457-A	0.31 0.28 0.68 0.46 0.68 0.28	4x10-54 4x10-40 5x10-27 3x10-21 1x10-16 1x10-12	1.68 (1.57-1.80) 1.69 (1.49-1.71) 1.61 (1.39-1.61) 1.37 (1.28-1.46) 1.32 (1.23-1.41) 1.3 (1.20-1.39)
Joubert BR, 2010	vertical transmission of HIV	100 cases 126 controls	NR	NS	NS	NS	NS	NS	NS
Pelak K, 2010	HIV-1 control	515 cases	NR	20p12.3 6p21.33 7p14.2 19p13.2 11q14.1 13q31.3 3p24.3 6q22.31 8p21.3 8p21.3	MCM8 HLA-B AOAH EVI5L Intergenic GPC5 AC023798.16 RP11-100A16.1 PPP3CC SORBS3	rs454422-? rs2523608-? rs6948404-? rs558718-? rs1357339-? rs1413191-? rs2593321-? rs2789066-? rs4872511-? rs2280890-?	0.26 0.37 0.07 0.11 0.04 0.18 0.23 0.13 0.01 0.01	1x10-6 3x10-6 3x10-6 4x10-6 5x10-6 5x10-6 8x10-6 9x10-6 9x10-6 9x10-6	NR
Rauch A, 2010	HCV, treatment failure	1,015 chronic cases 347 spontaneously cleared cases	NR	19q13.3	IL28B IL28A IL29	rs8099917-G	0.24	6x10-9	2.31 (1.74-3.06)
Davila S, 2010	meningococcal disease susceptibility	475 Caucasian cases 4702 controls	514 W. European cases 814 W. European controls 415 Spanish cases 537 Spanish controls	1q31.3	CFH, CFHR3	rs426736-?	0.84	5x10-13	1.59 (1.41-1.82)
Thye T, 2010	TB susceptibility	921 Ghanaian cases 1740 Ghanaian controls 1316 Gambian cases 1382 Gambian controls	1226 Ghanaian cases 3825 Ghanaian controls 236 Malawian cases 779 Malawian controls 332 Ghanaian trios & duos	18q11.2 6q24.3 16q23.3 2q23.3 17q12 19q13.31 2p15 18q21.32 4q24 14q32.13 16q23.1 8q11.22 8q21.3 7q32.1	GATA6,CTAGE1,RBBP8,CABLES1 NR NR Intergenic NR NR NR NR NR NR NR NR NR NR	rs4331426-G rs9373523-? rs12386026-? rs2335704-C rs712039-? rs1434579-? rs6545883-? rs4257308-? rs10005603-? rs8005962-? rs1948632-? rs7821565-? rs160441-T rs7787531-?	0.48 0.81 0.04 0.20 0.49 0.06 0.52 0.04 0.65 0.63 0.04 0.61 0.41 0.29	7x10-9 1x10-6 2x10-6 2x10-6 3x10-6 4x10-6 5x10-6 6x10-6 7x10-6 8x10-6 8x10-6 8x10-6 8x10-6 9x10-6	1.19 (1.10-1.30) 1.3 (1.11-1.43) 1.66 (1.30-2.00) 1.19 (1.10-1.30) 1.21 (1.10-1.30) 1.46 (1.20-1.70) 1.2 (1.11-1.25) 1.55 (1.30-1.90) 1.2 (1.11-1.25) 1.55 (1.30-1.90) 1.2 (1.11-1.25) 1.2 (1.10-1.30) 1.22 (1.10-1.30)
Feehally J, 2010	IgA nephropathy	533 family members 244 European cases 4980 European controls	NR	6p21.32	Intergenic	rs3115573-?	NR	1x10-9	1.62 (1.39-1.90)
Zhang 2010	hepatocellular carcinoma	348 Chinese cases 359 Chinese controls	1962 Chinese cases 1430 Chinese controls 159 Chinese trios	1p36.22	KIF1B, UBE4B, PGD	rs17401966-A	0.72	2x10-18	1.64 (1.49-1.82)
Petrovski S, 2010	HIV-1 susceptibility	848 Malawian cases 531 Malawian controls	NR	9p24.1 10q26.3 15q26.1 18q21.31 3q29 11q23.3	AL591509.5 GLRX3,TXNL3 FAM174B AC009271.7 ZDHHC19 BUD13	rs842304-? rs4751185-? rs285757-? rs12604483-? rs11924930-? rs1240773-?	0.42 0.12 0.15 0.30 0.40 0.12	4x10-6 7x10-6 7x10-6 7x10-6 7x10-6 8x10-6	NR
Clifford RJ, 2010	hepatocellular carcinoma	180 Korean cases 271 Korean controls	206 Korean cases 316 Korean controls 100 Chinese controls	3p22.3 6p21.33 14q32.11	GLB1 C2 C14orf143	rs4678680-? rs9267673-? rs12100561-?	0.07 0.08 0.39	2x10-7 2x10-6 4x10-6	2.27 [1.68-3.08] 1.97 [1.47-2.64] 1.52 [1.26-1.83]
The International HIV Controllers Study, 2010	HIV-1 control	516 European cases 1,196 European controls 341 African American cases 892 African American controls 117 Hispanic cases 560 Hispanic controls	NR	6p21.33	HLA-C MICA HLA-B HLA-B PSORS1C3 Intergenic HLA-B Intergenic	rs9264942-C rs4418214-C rs2395029-G rs2523608-G rs3131018-C rs2255221-T rs2523590-C rs9262632-G	0.34 0.075 0.032 0.326 0.625 0.137 0.164 0.10	3x10-35 1x10-34 1x10-25 9x10-20 4x10-16 4x10-14 2x10-13 1x10-8	2.9 [NR] 4.4 [NR] 5.3 [NR] 2.6 [NR] 2.1 [NR] 2.7 [NR] 2.4 [NR] 3.1 [NR]
*NS = no significant findings
°Kawasaki disease is thought to be caused by an as-yet unidentified infectious agent
